# Supplementary material
Source: PubMed Central journal article supplement (PMC4256082)
Supplement: NIHMS645073-supplement-PB066007_figureS1_pdf.pdf [file NIHMS645073-supplement-PB066007_figureS1_pdf.pdf]

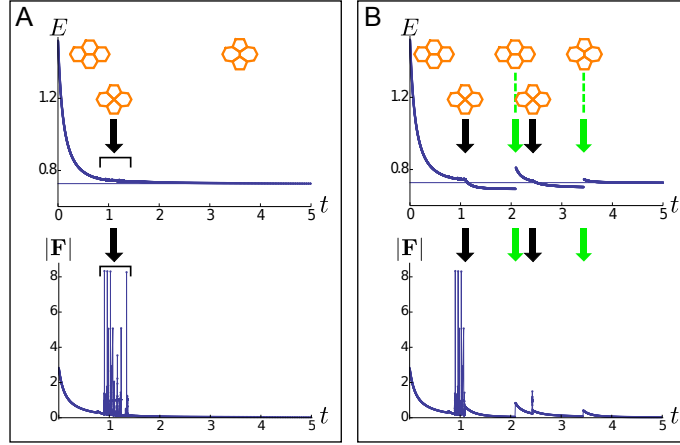

**Figure S1. Example of our implementation of noise to efficiently integrate the equations of motion through the repeated formations of T1 junctions.** Simulation of a uniform array of hexagonal cells, fixed at the boundaries to their equilibrium sizes where all bonds have edge tension  $\sigma_{ij} = 1$  with the exception of the intercalating bond, for which  $\sigma_{ij} = 3$  if the bond is formed horizontally, and  $\sigma_{ij} = 1.5$  if the bond is formed vertically. The final stable configuration has a *very short* vertical bond. A. The energy  $E$  (with the energy of uniformly patterned domain subtracted out) and magnitude of concatenated force  $|\mathbf{F}|$  are plotted as functions of time  $t$  when the simulation is done *without* implementation of noise for repeated T1 junctions (Movie S7). The T1 junction repeatedly forms 15 times, indicated by the black arrow and the discontinuities in  $|\mathbf{F}|$ , and it takes 26000 simulation steps to go from  $t = 0.78$  (the time of the first T1 junction formation) to  $t = 4$ . The light blue line indicates the energy  $E_0$  of the final stable configuration. B. The quantities  $E$  and  $|\mathbf{F}|$  are plotted as functions of time  $t$  when the simulation is done *with* implementation of noise for repeated T1 junctions (Movie S8). Black arrows indicate the formation of repeated 4-vertices; green arrows indicate times when bond tensions are restored after  $t_{\text{relax}} = 1$  had passed since the last T1 junction formation; the quantity  $|\mathbf{F}|$  is discontinuous at these points. Note that it is possible to have  $E < E_0$  since the tension of the bond may be temporarily artificially lowered. The T1 junction repeatedly forms 9 times in the simulation, and it takes 11000 simulation steps to of from  $t = 0.78$  to  $t = 4$ .
